# Supplementary material for: Mutation Scanning in Wheat by Exon Capture and Next-Generation Sequencing
Source: PubMed Central journal article supplement (PMC4559439; doi:10.1371/journal.pone.0137549), 2015-09-03
Supplement: pone.0137549.s001.pdf [file pone.0137549.s001.pdf]

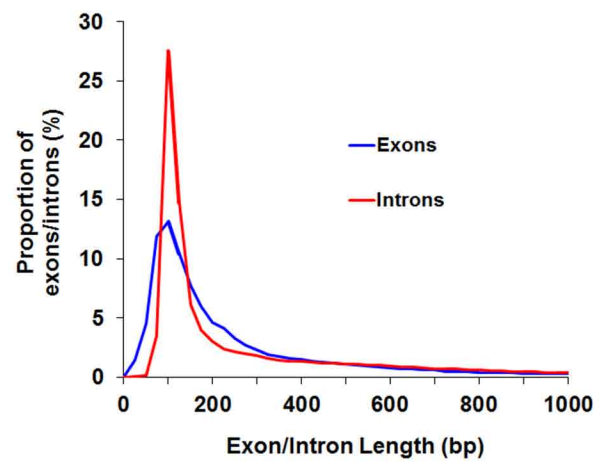

S1 Figure: Exon and intron sizes in the wheat genome. Exon and intron sizes were calculated from the GFF annotation file supplied with v21 of the IWGSC wheat genomic survey sequence at *Ensemble Plants*.
