# Supplementary material for: Mutation Scanning in Wheat by Exon Capture and Next-Generation Sequencing
Source: PubMed Central journal article supplement (PMC4559439; doi:10.1371/journal.pone.0137549), 2015-09-03
Supplement: pone.0137549.s002.pdf [file pone.0137549.s002.pdf]

A: IWGSC\_CSS\_6DL\_scaff\_3226755

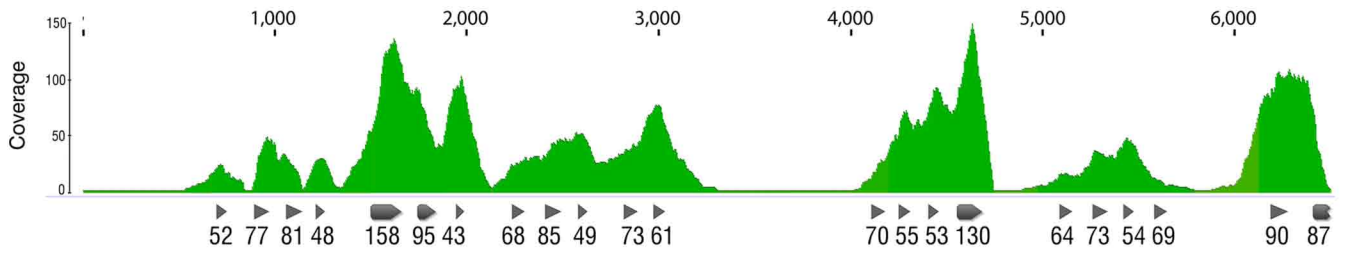

B: IWGSC\_CSS\_1AL\_scaff\_3889701

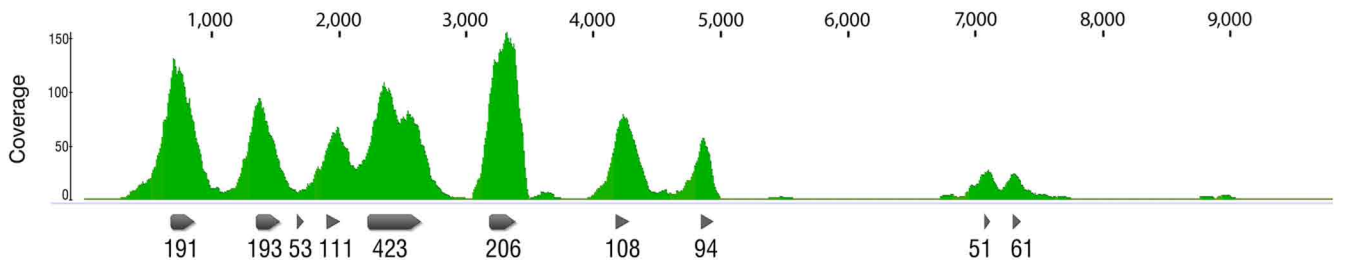

C: IWGSC\_CSS\_3AL\_scaff\_4253201

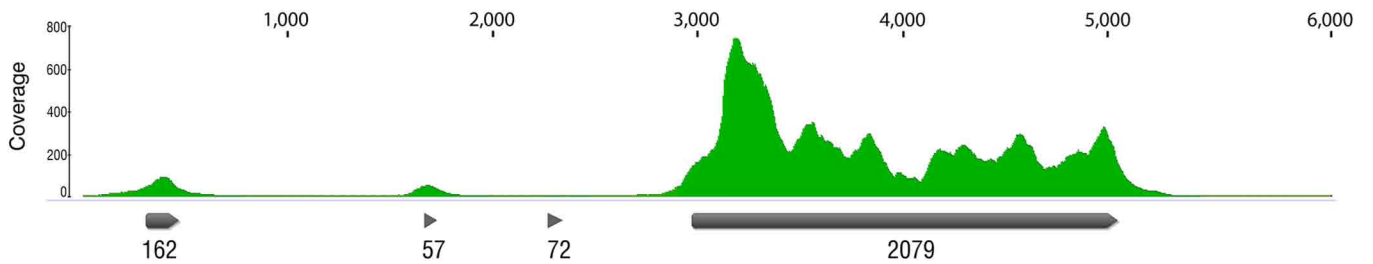

S2 Figure. Efficiency of capture of small exons. Example read alignments to three target genes illustrating the effect of flanking intron size on the coverage of small exons. Exons are shown as shaded arrows on the horizontal axis with sizes indicated below.
