# Supplementary material for: Mutation Scanning in Wheat by Exon Capture and Next-Generation Sequencing
Source: PubMed Central journal article supplement (PMC4559439; doi:10.1371/journal.pone.0137549), 2015-09-03
Supplement: pone.0137549.s003.pdf [file pone.0137549.s003.pdf]

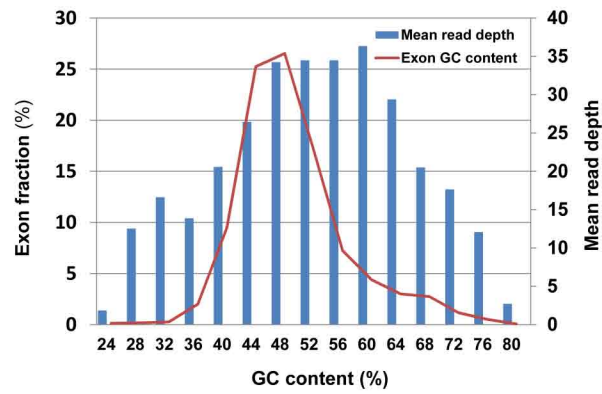

S3 Figure: Efficiency of capture by GC content. Plot shows the mean GC content of the target exons and their mean coverage by captured reads.
